# Supplementary material
Source: PubMed Central journal article supplement (PMC4701653)
Supplement: supp_3.4.E360_2014-0112-1-at.pdf [file supp_3.4.E360_2014-0112-1-at.pdf]

**Appendix 1 (as supplied by the authors): Codes to define maternal placental syndrome**

|                            | Ontario Health Insurance Plan (OHIP) Database | Canadian Institute for Health Information Discharge Abstract Database (CIHI DAD) |
|----------------------------|-----------------------------------------------|----------------------------------------------------------------------------------|
| Pre-eclampsia or eclampsia | 642.4 to 642.7                                | O11, O13, O15                                                                    |
| Placental abruption        | 641.2                                         | O45                                                                              |
| Placental infarction       | 656.7                                         | O43.1, O43.8, O43.9                                                              |
