# Supplementary material
Source: PubMed Central journal article supplement (PMC4701653)
Supplement: supp_3.4.E360_2014-0112-2-at.pdf [file supp_3.4.E360_2014-0112-2-at.pdf]

**Appendix 2 (as supplied by the authors): Sensitivity analysis with adjustment for obesity and smoking**

| <b>Covariate</b>                          | <b>Adjusted Odds Ratio (95% Confidence Interval)*</b> |
|-------------------------------------------|-------------------------------------------------------|
| HIV-infection                             | 0.85 (0.59 to 1.21)                                   |
| Pre-existing diabetes                     | 1.45 (1.38 to 1.52)                                   |
| Diabetes diagnosed during pregnancy       | 1.26 (1.22 to 1.31)                                   |
| Pre-existing hypertension                 | 4.23 (4.10 to 4.37)                                   |
| Hyperlipidemia                            | 1.01 (0.96 to 1.06)                                   |
| Chronic kidney disease                    | 1.84 (1.62 to 2.09)                                   |
| Smoking                                   | 0.89 (0.80 to 0.99)                                   |
| Obesity                                   | 1.25 (1.20 to 1.31)                                   |
| Immigration Status                        |                                                       |
| Non-immigrant                             | 1.00                                                  |
| Non-recent immigrant, Africa or Caribbean | 0.90 (0.85 to 0.95)                                   |
| Non-recent immigrant, other world regions | 0.70 (0.68 to 0.72)                                   |
| Recent immigrant, Africa or Caribbean     | 0.79 (0.73 to 0.85)                                   |
| Recent immigrant, other world regions     | 0.64 (0.62 to 0.66)                                   |
