# Supplementary material
Source: PubMed Central journal article supplement (PMC4701653)
Supplement: supp_3.4.E360_2014-0112_original_submission.pdf [file supp_3.4.E360_2014-0112_original_submission.pdf]

# Maternal placental syndromes among women living with HIV: a population-based study

**Short title: Maternal placental syndromes in women with HIV**

**Ryan Ng MSc<sup>1</sup>; Erin Macdonald MSc<sup>1</sup>; Mark H. Yudin, MD, MSc<sup>2,3,4</sup>; Ahmed M. Bayoumi MD, MSc<sup>1,2,3,5,6</sup>; Mona R. Loutfy MD, MPH<sup>1,5,6,7</sup>; Janet Raboud PhD<sup>1,8,9</sup>; Khatundi-Irene Masinde<sup>7</sup>; Wangari E. Tharao<sup>10</sup>; Jason Brophy MD, MSc<sup>11</sup>; Richard H. Glazier MD, MPH<sup>1,2,3,5,9,12</sup>; Tony Antoniou PhD<sup>1,2,12</sup>**

<sup>1</sup>Institute for Clinical Evaluative Sciences, Toronto, Ontario; <sup>2</sup>Li Ka Shing Knowledge Institute, St. Michael's Hospital, Toronto, Ontario; <sup>3</sup>Centre for Research on Inner City Health, St. Michael's Hospital, Toronto, Ontario, Canada; <sup>4</sup>Department of Obstetrics and Gynecology, St. Michael's Hospital and University of Toronto, Toronto, Ontario; <sup>5</sup>Institute of Health Policy, Management and Evaluation, University of Toronto, Toronto, Ontario; <sup>6</sup>Department of Medicine, University of Toronto, Toronto, Ontario; <sup>7</sup>Women's College Research Institute, Women's College Hospital, Toronto, Ontario; <sup>8</sup>Toronto General Research Institute, University Health Network, Toronto, Ontario; <sup>9</sup>Dalla Lana School of Public Health, University of Toronto, Toronto, Ontario; <sup>10</sup>Women's Health in Women's Hands Community Health Centre, Toronto, Ontario; <sup>11</sup>Children's Hospital of Eastern Ontario and University of Ottawa, Ottawa, Ontario; <sup>12</sup> Department of Family and Community Medicine, St. Michael's Hospital and University of Toronto, Toronto, Ontario

**Correspondence:** Tony Antoniou,  
410 Sherbourne Street, Toronto, ON M4X 1K2, Canada  
Tel: 416-867-7460 ext. 8344      email: [tantoniou@smh.ca](mailto:tantoniou@smh.ca)

**Text count:** 1779

**Abstract Word Count:** 250

1  
2  
3  
4  
5  
6  
7  
8  
9  
10  
11  
12  
13  
14  
15  
16  
17  
18  
19  
20  
21  
22  
23  
24  
25  
26  
27  
28  
29  
30  
31  
32  
33  
34  
35  
36  
37  
38  
39  
40  
41  
42  
43  
44  
45  
46  
47  
48  
49  
50  
51  
52  
53  
54  
55  
56  
57  
58  
59  
60

## Abstract

### Background

Maternal placental syndromes are associated with adverse fetal outcomes and maternal cardiovascular disease. However, whether HIV infection increases the risk of maternal placental syndromes is unknown.

### Methods

We conducted a population-based study using health administrative data from Ontario, Canada. We identified all pregnancies resulting in a live birth between April 1, 2002 and March 31, 2011, and identified women living with HIV using a validated case-finding algorithm. Our primary composite outcome was maternal placental syndromes, defined as a diagnosis of pre-eclampsia, eclampsia, placental abruption or placental infarction. We used generalized estimating equations with a logit link function to derive adjusted odds ratios (aORs) and 95% confidence intervals (CI) for the association of HIV infection with maternal placental syndromes.

### Results

A total of 1,132,871 pregnancies were available for analysis, of which 634 (0.06%) were among women with HIV. Following multivariable adjustment, there was no difference in the risk of maternal placental syndromes between women living with and without HIV infection (5.8% versus 5.6%; aOR 0.85, 95% CI 0.59 to 1.21). An increased risk of maternal placental syndromes was associated with pre-existing diabetes (aOR 1.47, 95% CI 1.39 to 1.54), chronic hypertension (aOR 4.28, 95% CI 4.15 to 4.42) and chronic kidney disease (aOR 1.83, 95% CI 1.61 to 2.08).

### Interpretation

1  
2  
3 Women with HIV are not at increased risk of maternal placental syndromes. Our results underscore the  
4  
5 importance of optimizing the management of co-morbid illness associated with maternal placental  
6  
7 syndromes during the prenatal period for all women, irrespective of HIV status.  
8  
9  
10  
11  
12  
13  
14  
15  
16  
17  
18  
19  
20  
21  
22  
23  
24  
25  
26  
27  
28  
29  
30  
31  
32  
33  
34  
35  
36  
37  
38  
39  
40  
41  
42  
43  
44  
45  
46  
47  
48  
49  
50  
51  
52  
53  
54  
55  
56  
57  
58  
59  
60

Confidential

## INTRODUCTION

Maternal placental syndromes are an inter-related group of disorders which include pre-eclampsia, eclampsia, placental infarction and placental abruption.<sup>1</sup> In affected pregnancies, maternal placental syndromes are associated with adverse fetal outcomes such as preterm delivery, fetal growth restriction and fetal death.<sup>1</sup> In addition to fetal harm, maternal placental syndromes are associated with an approximately two-fold increased risk of premature cardiovascular disease in affected women.<sup>2-5</sup> This association between maternal placental syndromes and future cardiovascular disease may reflect the effects of overlapping risk factors such as hypertension.<sup>6</sup> Alternatively, some evidence indicates that maternal placental syndromes precipitate a series of vascular changes in women that increase the risk of future cardiovascular impairment.<sup>7-10</sup> The association of maternal placental syndromes with maternal cardiovascular disease is augmented in women with pre-existing metabolic syndrome. In one study, the risk of future cardiovascular disease among women with maternal placental syndromes and one to two features of the metabolic syndrome was increased four-fold relative to women who had neither; this risk was increased more than 11-fold for women with three or four components of the metabolic syndrome.<sup>2</sup> These findings are particularly concerning in the context of HIV infection because the prevalence of metabolic syndrome is higher among women living with HIV relative to HIV-negative women, thereby predisposing these women to both maternal placental syndromes and cardiovascular sequelae.<sup>11-13</sup>

Several studies have compared the risk of one or more placental disorders between women living with and without HIV, with conflicting results.<sup>14-20</sup> A recent meta-analysis found no difference in the risk of pre-eclampsia between women living with and without HIV but was unable to precisely estimate the association between HIV and eclampsia (odds ratio 2.56, 95% confidence interval 0.15 to 44.11).<sup>21</sup> Furthermore, with the exception of one large study conducted in a sample of 20% of all community

1  
2  
3 hospitals in the United States,<sup>20</sup> existing risk estimates have been derived from single-center studies  
4  
5 with small sample sizes. Notably, many studies did not account for co-morbid diseases known to  
6  
7 influence the risk of maternal placental disorders, such as hypertension, diabetes and chronic kidney  
8  
9 disease. In addition, the existing literature reflects a time period (i.e. prior to 2003) that pre-dates the  
10  
11 widespread use of ritonavir-boosted protease inhibitor therapy among pregnant women with HIV.  
12  
13 Because protease inhibitors may increase the risk of metabolic syndrome and are currently used by  
14  
15 almost 80% of women living with HIV during pregnancy, contemporary estimates of the risk of  
16  
17 maternal placental syndromes among these women are required.<sup>22,23</sup> Accordingly, we compared the  
18  
19 risk of maternal placental syndromes between women living with and without HIV infection in a  
20  
21 population-based study in Ontario, Canada between April 1, 2002 and March 31, 2011.  
22  
23  
24  
25  
26

## 27 **METHODS**

### 28 **Data sources**

29  
30  
31 We used Ontario's administrative health databases, which were held securely in linkable files without  
32  
33 any direct personal identifiers, and analysed at the Institute for Clinical Evaluative Sciences (ICES).  
34  
35 Specifically, we identified all pregnancies among Ontario women between the ages of 18 and 49  
36  
37 during the study period using the MOMBABY database, which deterministically links the Canadian  
38  
39 Institute for Health Information Discharge Abstract Database (CIHI-DAD) inpatient admission records  
40  
41 of all mothers and their newborn infants from 2002/3 onward. Within this cohort, we identified births  
42  
43 to women living with HIV using the Ontario HIV Database, an administrative data registry of Ontario  
44  
45 residents with diagnosed HIV infection which was generated using a previously validated case-finding  
46  
47 algorithm.<sup>24</sup> We obtained demographic information from the Registered Persons Database, a registry of  
48  
49 all Ontario residents eligible for provincial health insurance. We obtained hospitalization data from the  
50  
51  
52  
53  
54  
55  
56  
57  
58  
59  
60

1  
2  
3 CIHI-DAD, which contains detailed clinical information regarding all hospital admissions in Ontario.  
4  
5 We used the Ontario Health Insurance Plan database to identify claims for physician services and pre-  
6  
7 existing medical conditions which may influence the risk of maternal placental syndromes. We used  
8  
9 validated disease registries to define the presence of diabetes and hypertension.<sup>25,26</sup> We used ecologic  
10  
11 measures of neighborhood instability and deprivation as measures of maternal socioeconomic status  
12  
13 using the 2006 Canadian Census.<sup>27</sup> We adjusted for differences in comorbidity by calculating the  
14  
15 number of Aggregated Diagnosis Groups for each woman, using the John Hopkins Adjusted Clinical  
16  
17 Group system.<sup>28</sup> We determined the adequacy of prenatal care using the Revised-Graduated Prenatal  
18  
19 Care Utilization Index (R-GINDEX).<sup>29</sup> The R-GINDEX is a summary measure of prenatal care, and is  
20  
21 calculated on the basis of the number of visits for prenatal care and the trimester care began, taking  
22  
23 gestational age into account. Finally, we ascertained immigration status and world region of origin  
24  
25 using the Citizenship and Immigration Database, and categorized time since immigration to Ontario as  
26  
27 recent (i.e.  $\leq 5$  years) or non-recent (i.e.  $>5$  years). These databases were linked in an anonymous  
28  
29 fashion using encrypted health card numbers, and are routinely used for population-based population-  
30  
31 based research examining pregnancy outcomes, including maternal placental syndromes.<sup>30-32</sup>  
32  
33  
34  
35  
36  
37  
38  
39  
40  
41  
42

#### 43 Outcome

44  
45  
46 Our primary composite outcome was maternal placental syndromes, defined as a diagnosis of pre-  
47  
48 eclampsia, eclampsia, placental abruption or placental infarction during each hospital admission for a  
49  
50 delivery. We ascertained the presence of each outcome from the maternal admission record in the  
51  
52 MOMBABY database using the International Classification of Diseases 10 revision (ICD-10) coding  
53  
54 system (Supplementary material).  
55  
56  
57  
58  
59  
60

## Statistical analyses

We compared baseline characteristics of mothers living with and without HIV using one-way analysis of variance for continuous variables, Cochran-Armitage tests for ordinal variables and chi-square tests for categorical variables. We compared the proportions of pregnancies complicated by maternal placental syndromes using multivariable general estimating equations with a logit link function and an exchangeable correlation structure to account for multiple pregnancies from the same woman during the follow-up period. We adjusted models for variables known to influence the risk of maternal placental syndromes, including age, parity, multiple versus singleton birth, maternal co-morbidity, hypertension, diabetes (pre-existing and diagnosed during pregnancy), chronic kidney disease, dyslipidemia, immigration status, adequacy of prenatal care and socioeconomic status.<sup>33</sup> All analyses were performed using SAS version 9.3 (Cary, NC).

## Ethics

This project was approved by the Research Ethics Board of Sunnybrook Health Sciences Centre, Toronto, Ontario.

## RESULTS

We identified 1,133,505 pregnancies between April 1, 2002 and March 31, 2011, of which 634 (0.06%) were among women living with HIV. Relative to women without HIV, women living with HIV were more likely to be immigrants to Ontario (48.1% versus 25.8%;  $p < 0.001$ ) and have a greater co-morbidity burden, as demonstrated by the median number of Aggregated Diagnosis Groups in the

1  
2  
3 preceding year [6 (interquartile range 5.0 to 9.0) vs. 4.0 (interquartile range 3.0 to 6.0);  $p < 0.001$ ]  
4  
5 (Table 1). However, with the exception of chronic kidney disease in the 24 months preceding  
6  
7 pregnancy, no differences were observed in the proportions of women living with and without HIV  
8  
9 with known risk factors for maternal placental syndromes, including pre-existing diabetes (1.9% versus  
10  
11 1.8%;  $p = 0.84$ ), diabetes diagnosed during pregnancy (5.8% versus 5.0%;  $p = 0.36$ ), pre-existing  
12  
13 hypertension (3.6% versus 2.6%;  $p = 0.12$ ) and hypertension diagnosed during pregnancy (3.5% versus  
14  
15 4.4%;  $p = 0.24$ ).  
16  
17  
18  
19

20  
21 Overall, 63,217 (5.6%) women developed maternal placental syndrome during the study. The  
22  
23 proportions of women living with and without HIV who developed maternal placental syndromes  
24  
25 during their pregnancy was similar (5.8% vs. 5.6%;  $p = 0.78$ ). Following multivariable adjustment,  
26  
27 there was no significant difference in the risk of maternal placental syndromes between women living  
28  
29 with and without HIV infection [adjusted odds ratio 0.85, 95% confidence interval (CI) 0.59 to 1.21]  
30  
31 (Table 2). The odds of maternal placental syndrome were lower among immigrants to Ontario relative  
32  
33 to non-immigrants, with the lowest risk being observed among recent (i.e. < 5 years) immigrants to the  
34  
35 province (Table 2). The risk of maternal placental syndromes was increased among women with  
36  
37 established risk factors for these disorders, including pre-existing diabetes (adjusted odds ratio 1.47,  
38  
39 95% CI 1.39 to 1.54), chronic hypertension (adjusted odds ratio 4.28, 95% CI 4.15 to 4.42) and chronic  
40  
41 kidney disease (adjusted odds ratio 1.83, 95% CI 1.61 to 2.08) (Table 2).  
42  
43  
44  
45  
46  
47  
48  
49  
50

## 51 **DISCUSSION**

52  
53  
54 We found no excess risk of maternal placental syndromes among women living with HIV relative to  
55  
56 HIV-negative women. Our study provides a contemporary population-based estimate of the risk of  
57  
58  
59  
60



1  
2  
3 maternal placental syndromes in women living with HIV and is reflective of a period during which  
4  
5 protease inhibitor-based antiretroviral therapy was used by the majority of women during the prenatal  
6  
7 period. Data from the Canadian Perinatal HIV Surveillance Program indicates that during the study  
8  
9 period, 86.5% of pregnant women with HIV in Ontario received combination antiretroviral therapy, of  
10  
11 whom 78.9% received protease inhibitors (personal communication).  
12  
13

14  
15  
16 Our findings are in general agreement with previously conducted studies,<sup>16,17,20</sup> but differ from those of  
17  
18 a cohort study which demonstrated a nearly five-fold increase in the risk of preeclampsia in 82 women  
19  
20 living with HIV relative to 8,686 HIV-negative women.<sup>19</sup> However, this study differed from ours in  
21  
22 several important respects, including being conducted in a single referral centre and a lack of control  
23  
24 for important confounders in the association between HIV-infection and preeclampsia, including  
25  
26 diabetes, hypertension and chronic kidney disease.  
27  
28

29  
30  
31 Although the difference in risk for maternal placental syndromes between women living with and  
32  
33 without HIV in our study did not reach statistical significance, the estimate for this association suggest  
34  
35 that women living with HIV may be at slightly lower risk for these outcomes. This interpretation may  
36  
37 provide some support for the notion that HIV-associated immune dysfunction prevents the excessive  
38  
39 maternal inflammatory response to paternal antigens and pregnancy thought to provoke the  
40  
41 development of preeclampsia.<sup>34-36</sup> Alternatively, the lower risk of maternal placental syndromes among  
42  
43 women living with HIV may partially reflect a healthy immigrant effect, a premise supported by our  
44  
45 finding of lower risk among recent immigrants and previous work documenting a progressively lower  
46  
47 risk of maternal placental syndromes associated with recency of immigration.<sup>32</sup>  
48  
49  
50  
51

52  
53 Our study is strengthened by the population-based nature of the data, thereby allowing us to study over  
54  
55 one million pregnancies during the study period. However, some limitations of our study merit  
56  
57  
58  
59  
60

1  
2  
3 emphasis. First, we could not ascertain births that occurred outside the hospital, which accounts for  
4  
5 approximately 1.1% of all births in Ontario.<sup>37</sup> Second, we had no data on some determinants of  
6  
7 maternal placental syndromes, including smoking and body mass index. Finally, we used  
8  
9 administrative data and outcome misclassification is therefore possible. However, differential  
10  
11 outcomes misclassification is unlikely because maternal placental syndromes are recorded for all  
12  
13 women at the time of delivery in mandatory fields of the Ontario birth record by the attending  
14  
15 physician or midwife.  
16  
17  
18  
19  
20

21  
22 In conclusion, our population-based study indicates that HIV is not associated with a heightened risk of  
23  
24 maternal placental syndromes. In contrast, diabetes, hypertension and chronic kidney disease impart a  
25  
26 substantial increase in the risk of these outcomes. These data reinforce the importance of optimizing  
27  
28 the management of these co-morbid conditions during the prenatal period for all women, irrespective  
29  
30 of HIV status.  
31  
32  
33  
34

### 35 **Competing interests**

36  
37  
38 None of the authors have competing interests related to this work.  
39  
40

### 41 **Funding**

42  
43  
44 This project was supported by a research operating grant from the Ontario HIV Treatment Network  
45  
46 and by the Institute for Clinical Evaluative Sciences (ICES), which is funded by an annual grant from  
47  
48 the Ontario Ministry of Health and Long-Term Care (MOHLTC). The sponsors had no role in the  
49  
50 design or conduct of the study; in the collection, analysis or interpretation of the data; or in the  
51  
52 preparation, review or approval of the manuscript. The opinions, results and conclusions reported in  
53  
54  
55  
56  
57  
58  
59  
60

1  
2  
3 this paper are those of the authors and are independent from the funding source. No endorsement by  
4  
5 ICES or the Ontario MOHLTC is intended or should be inferred.  
6  
7

8  
9 Tony Antoniou is supported by a New Investigator Award from the Canadian Institutes for Health  
10  
11 Research-Ontario HIV Treatment Network. Mona Loutfy is the recipient of salary support from  
12  
13 Women's College Hospital, the University of Toronto and the Women's College Research Institute.  
14  
15 Ahmed M. Bayoumi was supported by a Canadian Institutes for Health Research / Ontario Ministry of  
16  
17 Health and Long-Term Care Applied Chair in Health Services and Policy Research. Janet Raboud is  
18  
19 supported by an Ontario HIV Treatment Network Career Scientist Award and the Skate the Dream  
20  
21 Fund, Toronto and Western Hospital Foundation. Richard H. Glazier is a Clinician Scientist in the  
22  
23 Department of Family and Community Medicine of St. Michael's Hospital and the University of  
24  
25 Toronto.  
26  
27  
28  
29

### 30 31 **Author contributions**

32  
33  
34 All authors contributed to the concept and design of the study. Tony Antoniou, Ryan Ng and Erin  
35  
36 Macdonald acquired the data, and all authors were involved in the analysis and interpretation of the  
37  
38 data. Ryan Ng and Tony Antoniou drafted the manuscript, and all authors were involved in critical  
39  
40 revision of the manuscript. All authors approved the manuscript submitted for publication. Tony  
41  
42 Antoniou, Erin Macdonald and Ryan Ng provided administrative, technical or material support. Tony  
43  
44 Antoniou is the guarantor for the manuscript.  
45  
46  
47  
48  
49  
50  
51  
52  
53  
54  
55  
56  
57  
58  
59  
60

## REFERENCES

1. Scantlebury DC, Hayes SN, Garovic VD. Pre-eclampsia and maternal placental syndromes: an indicator or cause of long-term cardiovascular disease? *Heart* 2012;98:1109-11.
2. Ray JG, Vermeulen MJ, Schull MJ, Redelmeier DA. Cardiovascular health after maternal placental syndromes (CHAMPS): population-based retrospective cohort study. *Lancet* 2005;366:1797-1803.
3. Wilson BJ, Watson MS, Prescott GJ, Sunderland S, Campbell DM, Hannaford P, et al. Hypertensive diseases of pregnancy and risk of hypertension and stroke in later life: results from cohort study. *BMJ* 2003;326:845.
4. Kestenbaum B, Seliger SL, Easterling TR, Gillen DL, Critchlow CW, Stehman-Breen CO, et al. Cardiovascular and thromboembolic events following hypertensive pregnancy. *Am J Kidney Dis* 2003;42:982-89.
5. Ray JG, Schull MJ, Kingdom JC, Vermeulen MJ. Heart failure and dysrhythmias after maternal placental syndromes: HAD MPS Study. *Heart* 2012;98:1136-41.
6. Garovic VD, Hayman SR. Hypertension in pregnancy: an emerging risk factor for cardiovascular disease. *Nat Clin Pract Nephrol* 2007;3:613-22.
7. Melchiorre K, Sutherland GR, Baltabaeva A, Liberati M, Thilaganathan B. Maternal cardiac dysfunction and remodeling in women with preeclampsia at term. *Hypertension* 2011;57:85-93.
8. Melchiorre K, Sutherland GR, Liberati M, Thilaganathan B. Preeclampsia is associated with persistent postpartum cardiovascular impairment. *Hypertension* 2011;58:709-15.
9. Zandstra M, Stekkinger E, van der Vlugt MJ, van Dijk AP, Lotgering FK, Spaanderman ME. Cardiac diastolic dysfunction and metabolic syndrome in young women after placental syndrome. *Obstet Gynecol* 2010;115:101-8.

- 1  
2  
3 10. Chambers JC, Fusi L, Malik IS, Haskard DO, De Swiet M, Kooner JS. Association of maternal  
4  
5  
6  
7  
8  
9  
10  
11  
12  
13  
14  
15  
16  
17  
18  
19  
20  
21  
22  
23  
24  
25  
26  
27  
28  
29  
30  
31  
32  
33  
34  
35  
36  
37  
38  
39  
40  
41  
42  
43  
44  
45  
46  
47  
48  
49  
50  
51  
52  
53  
54  
55  
56  
57  
58  
59  
60  
10. Chambers JC, Fusi L, Malik IS, Haskard DO, De Swiet M, Kooner JS. Association of maternal  
endothelial dysfunction with preeclampsia. *JAMA* 2001;285:1607-12.
11. Sobieszczyk ME, Hoover DR, Anastos K, Mulligan K, Tan T, Shi Q, et al. Prevalence and  
predictors of metabolic syndrome among HIV-infected and HIV-uninfected women in the  
Women's Interagency HIV Study. *J Acquir Immune Defic Syndr* 2008;48:272-80.
12. Dolan SE, Hadigan C, Killilea KM, Sullivan MP, Hemphill L, Lees RS, et al. Increased  
cardiovascular disease risk indices in HIV-infected women. *J Acquir Immune Defic Syndr*  
2005;39:44-54.
13. Johnsen S, Dolan SE, Fitch KV, Kanter JR, Hemphill LC, Connelly JM, et al. Carotid intimal  
medial thickness in human immunodeficiency virus-infected women: effects of protease  
inhibitor use, cardiac risk factors and the metabolic syndrome. *J Clin Endocrinol Metab*  
2006;91:4916-24.
14. Boyajian T, Shah PS, Murphy KE. Risk of preeclampsia in HIV-positive pregnant women  
receiving HAART: a matched cohort study. *J Obstet Gynaecol Can* 2012;34:136-41.
15. Wimalasundera RC, LARBalestier N, Smith JH, de Ruiter A, McG Thom SA, Hughes AD, et al.  
Pre-eclampsia, antiretroviral therapy, and immune reconstitution. *Lancet* 2002;360:1152-4.
16. Boer K, Nellen J, Patel D, Timmermans S, Tempelman C, Wibaut M, et al. The AmRo Study:  
pregnancy outcome in HIV-1 infected women under effective highly active antiretroviral  
therapy and a policy of vaginal delivery. *BJOG* 2007;114:148-55.
17. Haeri S, Shauer M, Dale M, Leslie J, Baker AM, Saddlemire S, et al. Obstetric and newborn  
infant outcomes in human immunodeficiency virus-infected women who receive highly active  
antiretroviral therapy. *Am J Obstet Gynecol* 2009;201:315.e1-e5.

- 1  
2  
3 18. Mattar R, Amed AM, Lindsey PC, Sass N, Daher S. Preeclampsia and HIV infection. *Eur J*  
4  
5 *Obstet Gynecol Reprod Biol* 2004;11:240-1.  
6  
7  
8 19. Suy A, Martínez E, Coll O, Lonca M, Palacio M, de Lazzari E, et al. Increased risk of pre-  
9  
10 eclampsia and fetal death in HIV-infected pregnant women receiving highly active  
11  
12 antiretroviral therapy. *AIDS* 2006;20:59-66.  
13  
14  
15 20. Kourtis AP, Bansil P, McPheeters M, Meikle SF, Posner SF, Jamieson DJ. Hospitalizations of  
16  
17 pregnant HIV-infected women in the USA prior to and during the era of HAART, 1994-2003.  
18  
19 *AIDS* 2006;20:1823-31.  
20  
21  
22 21. Calvert C, Ronsmans C. HIV and the risk of direct obstetric complications: a systematic review  
23  
24 and meta-analysis. *PLoS One* 2013;8:e774848.doi:10.1371/journal.pone.0074848.  
25  
26  
27 22. Tsiodras S, Mantzoros C, Hammer S, Samore M. Effects of protease inhibitors on  
28  
29 hyperglycemia, hyperlipidemia and lipodystrophy: a 5-year cohort study. *Arch Intern Med*  
30  
31 2000;160:2050-6.  
32  
33  
34 23. Griner R, Williams PL, Read JS, Seage GR 3rd, Crain M, Yogev R, et al. In utero and postnatal  
35  
36 exposure to antiretrovirals among HIV-exposed but uninfected children in the United States.  
37  
38 *AIDS Patient Care STDS* 2011;25:385-94.  
39  
40  
41 24. Antoniou T, Zagorski B, Loutfy MR, Strike C, Glazier RH. Validation of case-finding  
42  
43 algorithms derived from administrative data for identifying adults living with human  
44  
45 immunodeficiency virus infection. *PLoS One* 2011;6:e21748.  
46  
47  
48 25. Hux JE, Ivis F, Flintoft V, Bica A. Diabetes in Ontario: determination of prevalence and  
49  
50 incidence using a validated administrative data algorithm. *Diabetes Care* 2002;25:512-6.  
51  
52  
53 26. Tu K, Campbell NR, Chen ZL, Cauch-Dudek KJ, McAlister FA. Accuracy of administrative  
54  
55 databases in identifying patients with hypertension. *Open Med* 2007;1:e18-26.  
56  
57  
58  
59  
60

- 1  
2  
3 27. Matheson FI, Dunn JR, Smith KLW, Moineddin R, Glazier RH. Development of the Canadian  
4  
5 Marginalization Index: a new tool for the study of inequality. *Can J Public Health*  
6  
7 2012;103(Suppl 2):S12-S16.  
8  
9
- 10 28. Johns Hopkins University. Johns Hopkins ACG Case-Mix Adjustment System. Available at:  
11  
12 <http://www.ach.jhsph.org>.  
13  
14
- 15 29. Alexander GR, Kotelchuck M. Quantifying the adequacy of prenatal care: a comparison of  
16  
17 indices. *Public Health Rep* 1996;111:408-18.  
18  
19
- 20 30. Antoniou T, Zagorski B, Macdonald EM, Bayoumi AM, Raboud J, Brophy J, et al. Trends in  
21  
22 live birth rates and adverse neonatal outcomes among HIV-positive women in Ontario, Canada,  
23  
24 2002- 2009: a descriptive population-based study. *Int J STD AIDS*. 2014 Apr 7. [Epub ahead  
25  
26 of print]  
27  
28
- 29 31. Vigod SN, Kurdyak PA, Dennis CL, Gruneir A, Newman A, Seeman MV, et al. Maternal and  
30  
31 newborn outcomes among women with schizophrenia: a retrospective population-based cohort  
32  
33 study. *BJOG* 2014;DOI10.1111/1471-0528.12567.  
34  
35
- 36 32. Ray, JG, Vermeulen MJ, Schull MJ, Singh G, Shah R, Redelmeier DA. Results of the Recent  
37  
38 Immigrant Pregnancy and Perinatal Long-term Evaluation Study (RIPPLES). *CMAJ*  
39  
40 2007;176:1419-26.  
41  
42
- 43 33. Duckitt K, Harrington D. Risk factors for pre-eclampsia at antenatal booking: systematic  
44  
45 review of controlled trials. *BMJ* 2005;330:565.  
46  
47
- 48 34. Dekker GA, Robillard PY, Hulsey TC. Immune maladaptation in the etiology of preeclampsia: a  
49  
50 review of corroborative epidemiologic studies. *Obstet Gynecol Surv* 1998;53:377-82.  
51  
52
- 53 35. Redman CW, Sacks GP, Sargent IL. Preeclampsia: an excessive maternal inflammatory  
54  
55 response to pregnancy. *Am J Obstet Gynecol* 1999;180(2 Pt 1):499-506.  
56  
57  
58  
59  
60

1  
2  
3  
4  
5  
6  
7  
8  
9  
10  
11  
12  
13  
14  
15  
16  
17  
18  
19  
20  
21  
22  
23  
24  
25  
26  
27  
28  
29  
30  
31  
32  
33  
34  
35  
36  
37  
38  
39  
40  
41  
42  
43  
44  
45  
46  
47  
48  
49  
50  
51  
52  
53  
54  
55  
56  
57  
58  
59  
60

36. Hall DR. Is pre-eclampsia less common in patients with HIV/AIDS? J Reprod Immunol  
2007;76:75-7.

37. Canadian Institute for Health Information. Too early, too small: a profile of small babies across  
Canada. Ottawa, CIHI, 2009.

Confidential



**Table 1: Baseline characteristics of pregnancies according to HIV status**

| Characteristic                            | HIV<br>(n = 634) | Non-HIV<br>(n = 1,132,871) | p-value |
|-------------------------------------------|------------------|----------------------------|---------|
| Mean age $\pm$ SD (years)                 | 30.8 $\pm$ 5.2   | 30.1 $\pm$ 5.2             | 0.002   |
| 18 to 34 years                            | 470 (74.1%)      | 895,675 (79.1%)            | 0.002   |
| 35 to 49 years                            | 164 (25.9%)      | 237,196 (20.9%)            |         |
| Aggregated Diagnosis Groups               |                  |                            |         |
| Median (IQR)                              | 6.0 (5.0 – 9.0)  | 4.0 (3.0 – 6.0)            | < 0.001 |
| Pre-existing diabetes                     | 12 (1.9%)        | 20,211 (1.8%)              | 0.84    |
| Diabetes diagnosed during pregnancy       | 37 (5.8%)        | 57,007 (5.0%)              | 0.36    |
| Pre-existing hypertension                 | 23 (3.6%)        | 29,789 (2.6%)              | 0.12    |
| Hypertension diagnosed during pregnancy   | 22 (3.5%)        | 50,192 (4.4%)              | 0.24    |
| Hyperlipidemia                            | 19 (3.0%)        | 25,984 (2.3%)              | 0.24    |
| Obesity                                   | 17 (2.7%)        | 30,659 (2.7%)              | 0.97    |
| Chronic kidney disease                    | 8 (1.3%)         | 2,046 (0.2%)               | < 0.001 |
| Adequacy of prenatal care (R-GINDEX)      |                  |                            | < 0.001 |
| Adequate                                  | 175 (27.6%)      | 428,867 (37.9%)            |         |
| Intensive                                 | 54 (8.5%)        | 61,597 (5.4%)              |         |
| Intermediate                              | 304 (47.9%)      | 484,055 (42.7%)            |         |
| Inadequate                                | 101 (15.9%)      | 156,982 (13.9%)            |         |
| Immigration Status                        |                  |                            | < 0.001 |
| Non-immigrant                             | 329 (51.9%)      | 840,609 (74.2%)            |         |
| Non-recent immigrant, Africa or Caribbean | 97 (15.3%)       | 23,814 (2.1%)              |         |
| Non-recent immigrant, other world regions | 28 (4.4%)        | 108,480 (9.6%)             |         |
| Recent immigrant, Africa or Caribbean     | 157 (24.8%)      | 15,412 (1.4%)              |         |
| Recent immigrant, other world regions     | 23 (3.6%)        | 144,556 (12.8%)            |         |
| Material Deprivation Income Quintile      |                  |                            | < 0.001 |
| 1 (lowest)                                | 68 (10.7%)       | 296,868 (26.2%)            |         |

| Characteristic                   | HIV<br>(n = 634) | Non-HIV<br>(n = 1,132,871) | p-value |
|----------------------------------|------------------|----------------------------|---------|
| 2                                | 72 (11.4%)       | 233,052 (20.6%)            |         |
| 3                                | 98 (15.5%)       | 213,667 (18.9%)            |         |
| 4                                | 117 (18.5%)      | 190,959 (16.9%)            |         |
| 5                                | 261 (41.2%)      | 183,836 (16.2%)            |         |
| Residential Instability Quintile |                  |                            | < 0.001 |
| 1 (lowest)                       | 77 (12.1%)       | 303,577 (26.8%)            |         |
| 2                                | 72 (11.4%)       | 228,844 (20.2%)            |         |
| 3                                | 69 (10.9%)       | 168,458 (14.9%)            |         |
| 4                                | 145 (22.9%)      | 214,871 (19.0%)            |         |
| 5                                | 253 (39.9%)      | 202,632 (17.9%)            |         |
| Multiple birth                   | 19 (3.0%)        | 19,849 (1.8%)              | 0.02    |
| Preterm birth                    | 100 (15.8%)      | 81,047 (7.2%)              | < 0.001 |

SD, standard deviation; IQR, interquartile range

**Table 2: Regression models of predictors of maternal placental syndrome**

| <b>Covariate</b>                          | <b>Crude Odds Ratio<br/>(95% Confidence Interval)</b> | <b>Adjusted Odds Ratio<br/>(95% Confidence Interval)*</b> |
|-------------------------------------------|-------------------------------------------------------|-----------------------------------------------------------|
| HIV-infection                             | 1.02 (0.72 to 1.45)                                   | 0.85 (0.59 to 1.21)                                       |
| Pre-existing diabetes                     | 2.05 (1.95 to 2.14)                                   | 1.47 (1.39 to 1.54)                                       |
| Diabetes diagnosed during pregnancy       | 1.47 (1.42 to 1.51)                                   | 1.27 (1.23 to 1.31)                                       |
| Pre-existing hypertension                 | 5.15 (5.01 to 5.32)                                   | 4.28 (4.15 to 4.42)                                       |
| Hyperlipidemia                            | 1.27 (1.21 to 1.33)                                   | 1.03 (0.98 to 1.08)                                       |
| Chronic kidney disease                    | 3.78 (3.37 to 4.25)                                   | 1.83 (1.61 to 2.08)                                       |
| <b>Immigration Status</b>                 |                                                       |                                                           |
| Non-immigrant                             | 1.00                                                  | 1.00                                                      |
| Non-recent immigrant, Africa or Caribbean | 1.00 (0.95 to 1.06)                                   | 0.90 (0.85 to 0.95)                                       |
| Non-recent immigrant, other world regions | 0.72 (0.69 to 0.74)                                   | 0.70 (0.68 to 0.72)                                       |
| Recent immigrant, Africa or Caribbean     | 0.83 (0.77 to 0.89)                                   | 0.79 (0.73 to 0.85)                                       |
| Recent immigrant, other world regions     | 0.63 (0.61 to 0.64)                                   | 0.64 (0.62 to 0.66)                                       |

\*Models also adjusted for age, parity, world region of birth, maternal comorbidity (using Aggregated Diagnosis Groups), hyperlipidemia, chronic kidney disease, adequacy of prenatal care and neighborhood instability and deprivation

1  
2  
3  
4  
5  
6  
7  
8  
9  
10  
11  
12  
13  
14  
15  
16  
17  
18  
19  
20  
21  
22  
23  
24  
25  
26  
27  
28  
29  
30  
31  
32  
33  
34  
35  
36  
37  
38  
39  
40  
41  
42  
43  
44  
45  
46  
47  
48  
49  
50  
51  
52  
53  
54  
55  
56  
57  
58  
59  
60

**Supplementary Materials**

**Table 1: Codes to define maternal placental syndrome**

|                            | Ontario Health Insurance Plan (OHIP) Database | Canadian Institute for Health Information Discharge Abstract Database (CIHI DAD) |
|----------------------------|-----------------------------------------------|----------------------------------------------------------------------------------|
| Pre-eclampsia or eclampsia | 642.4 to 642.7                                | O11, O13, O15                                                                    |
| Placental abruption        | 641.2                                         | O45                                                                              |
| Placental infarction       | 656.7                                         | O43.1, O43.8, O43.9                                                              |

Confidential
